# Supplementary material
Source: HighWire-hosted journal article supplement (https://cmaj.ca/highwire/filestream/79955/field_highwire_adjunct_files/0/211026-image-1-at.pdf)
Supplement: 211026-image-1-at.pdf [file 211026-image-1-at.pdf]

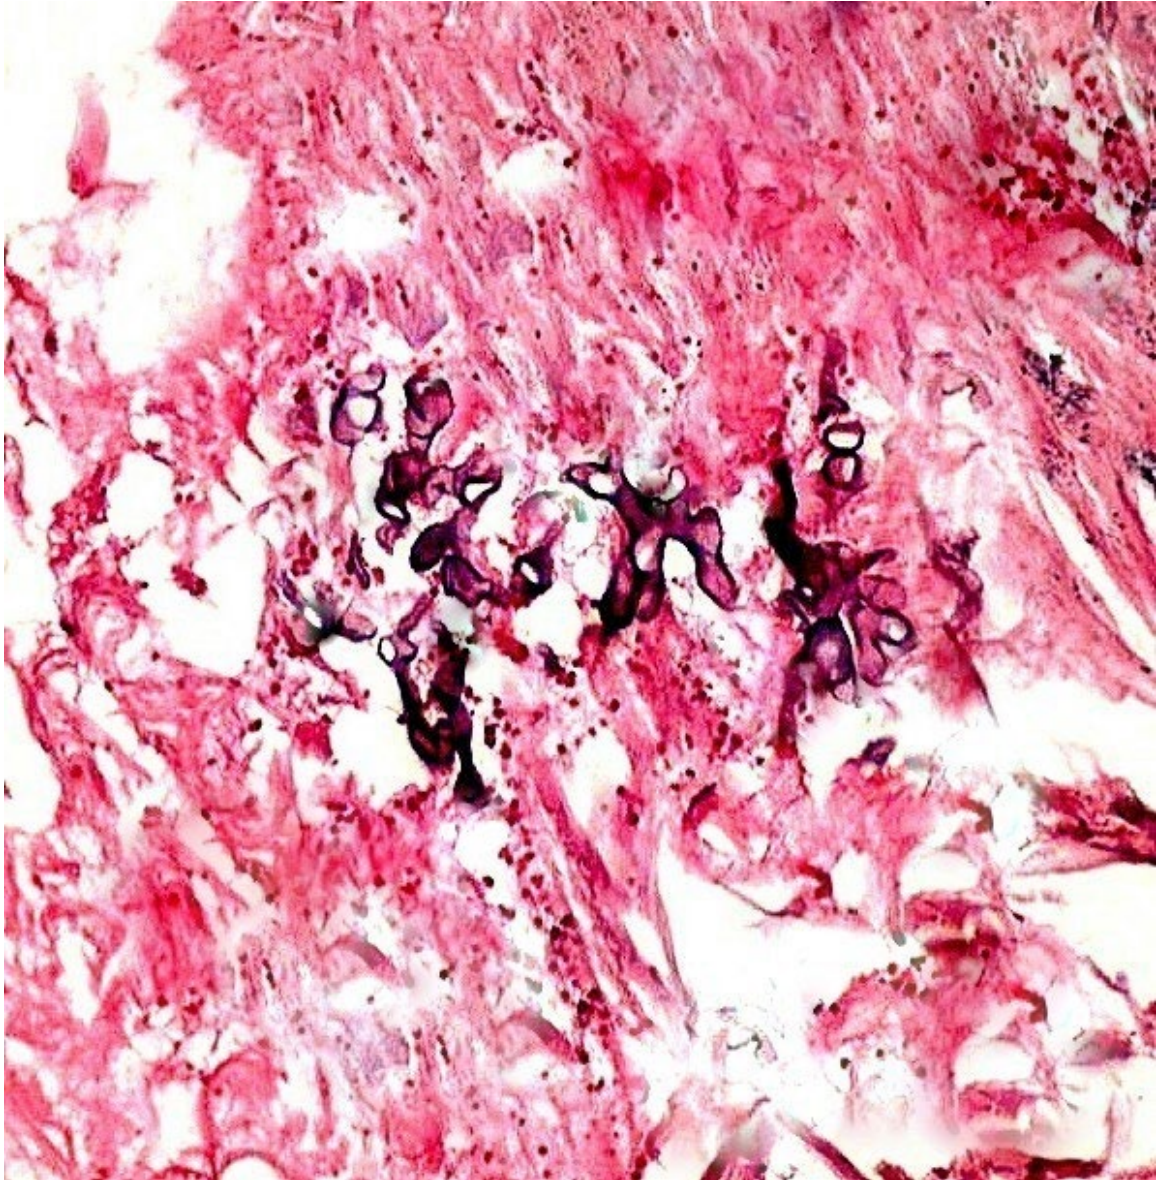

Histopathological examination of the tissue revealed an abundant admixture of acute and chronic inflammatory infiltrate with necrosis and large non-septate, pleomorphic, thin-walled fungal hyphae with irregular contours. The microorganisms are clustered around blood vessels.(hematoxylin and eosin  $\times 40$ )
